# Supplementary material for: Early whole blood transcriptional responses to radiation-attenuated Plasmodium falciparum sporozoite vaccination in malaria naïve and malaria pre-exposed adult volunteers
Source: Springer Nature journal article supplement (doi:10.1186/s12936-021-03839-3), 2021-07-09
Supplement: MOESM2 [file 19348616]

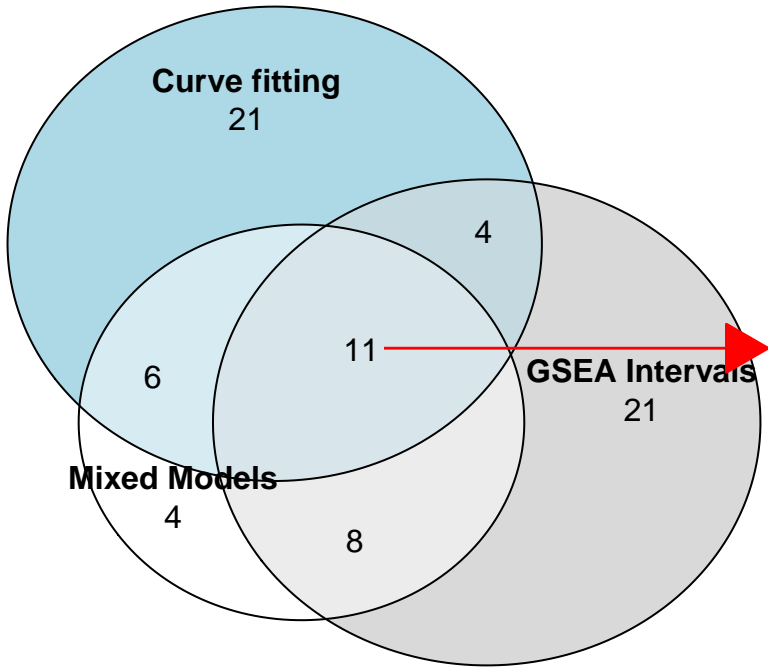

DC.M3.1\_Erythrocytes  
LI.M4.1\_cell cycle (I)  
DC.M3.3\_Cell Cycle  
LI.M4.2\_PLK1 signaling events  
DC.M2.3\_Erythrocytes  
LI.M4.5\_mitotic cell cycle in stimulated CD4 T cells  
LI.M6\_mitotic cell division  
LI.M4.12\_C-MYC transcriptional network  
DC.M6.11\_Cell Cycle  
LI.M4.7\_mitotic cell cycle  
LI.M4.10\_cell cycle (II)
